# Supplementary material for: El acceso y suministro de bienes y servicios en la LO 3/2007 de 22 de marzo, para la igualdad efectiva de mujeres y hombres, con especial referencia a los seguros
Source: MDPI journal article supplement (doi:10.3390/ijms23084398), 2007-01-01
Supplement: s1 [file s1]

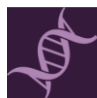

Article

# A Flower-like $\text{In}_2\text{O}_3$ Catalyst Derived via Metal–Organic Frameworks for Photocatalytic Applications

Munisamy Maniyazagan <sup>1</sup>, Hyeon-Woo Yang <sup>1</sup>, Perumal Naveenkumar <sup>1</sup>, Nayoung Kang <sup>1</sup>, Woo Seung Kang <sup>2</sup> and Sun-Jae Kim <sup>1,\*</sup>

- <sup>1</sup> Department of Nanotechnology and Advanced Materials Engineering, Sejong University, Seoul 05006, Korea; manichemist@gmail.com (M.M.); hyunket@naver.com (H.-W.Y.); pcnaveenperumal@gmail.com (P.N.); nykang0615@naver.com (N.K.); wkang651@inhac.ac.kr (W.S.K.)  
<sup>2</sup> Department of Metallurgical and Materials Engineering, Inha Technical College, Incheon 22212, Korea

## 1. Photocatalytic activity

### 1.1. Degradation of MB

The photocatalytic activities of prepared samples were evaluated through degradation of Methylene blue. 0.2 g of  $\text{In}_2\text{O}_3$ -MF catalyst was added to 50 mL of MB dye (30 mg  $\text{L}^{-1}$ ) and stirred under UV–Vis light. Before UV–Vis light irradiation, the suspension was magnetically stirred in the darkness for 30 min to keep the adsorption–desorption equilibrium. By monitoring the absorption bands of MB at 664 nm, the relationship between reaction progress and time can be determined.

### 1.2. Reduction of 4-NP to 4-AP

An aqueous solution of p-nitrophenol ( $10^{-4}$  M) and fresh  $\text{NaBH}_4$  ( $10^{-3}$  M) were added into a beaker. 0.3 g of the  $\text{In}_2\text{O}_3$ -MF catalyst was then added to the mixture to begin the reduction reaction. The reaction progress was followed via UV–vis spectroscopy. 4-NP has a maximum absorption peak at 318 nm. Upon the addition of little amount  $\text{NaBH}_4$ , this peak change to 400 nm due to the formation of phenolate ion. After reduction of the phenolate ion, the peak at about 400 nm is flattened and the amine peak appears at 300 nm. In order to evaluate the reaction rate, the concentration chart was plotted against the absorption.

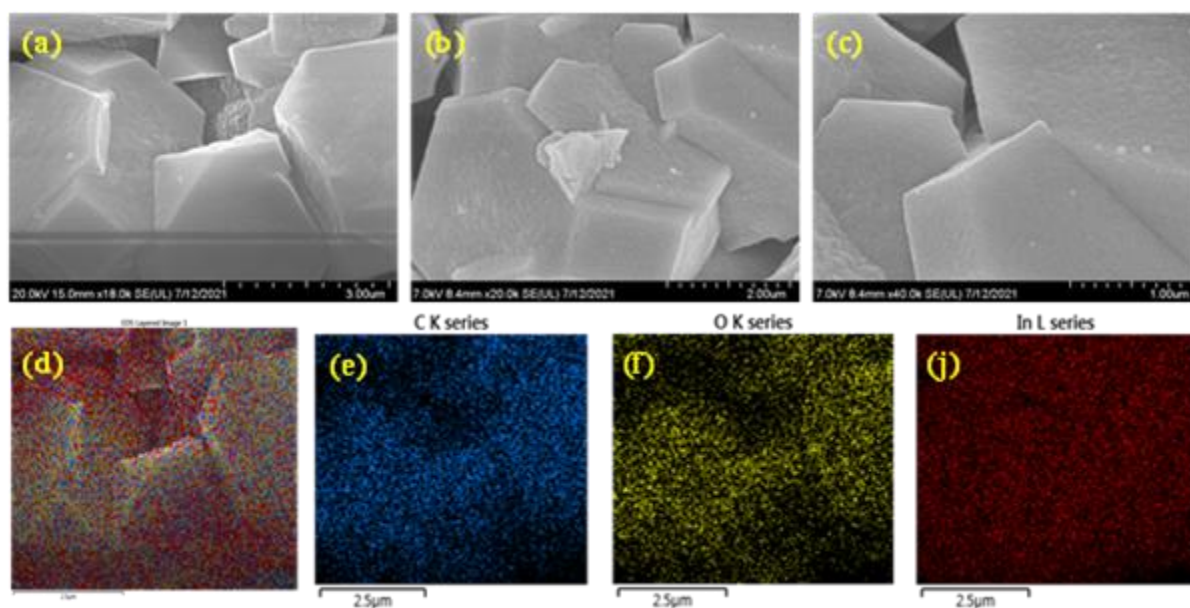

Figure S1. SEM image (a-c), element mappings of  $\text{In}_2\text{O}_3\text{-MD}$  (d-j).

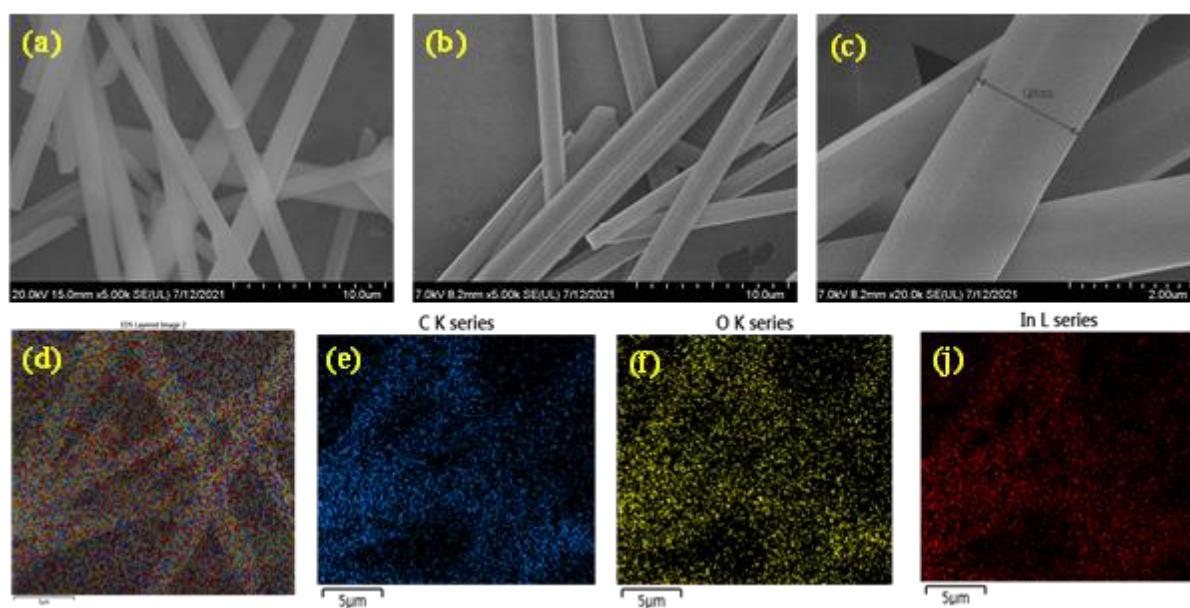

Figure S2. SEM image (a-c), element mappings of  $\text{In}_2\text{O}_3\text{-MR}$  (d-j).

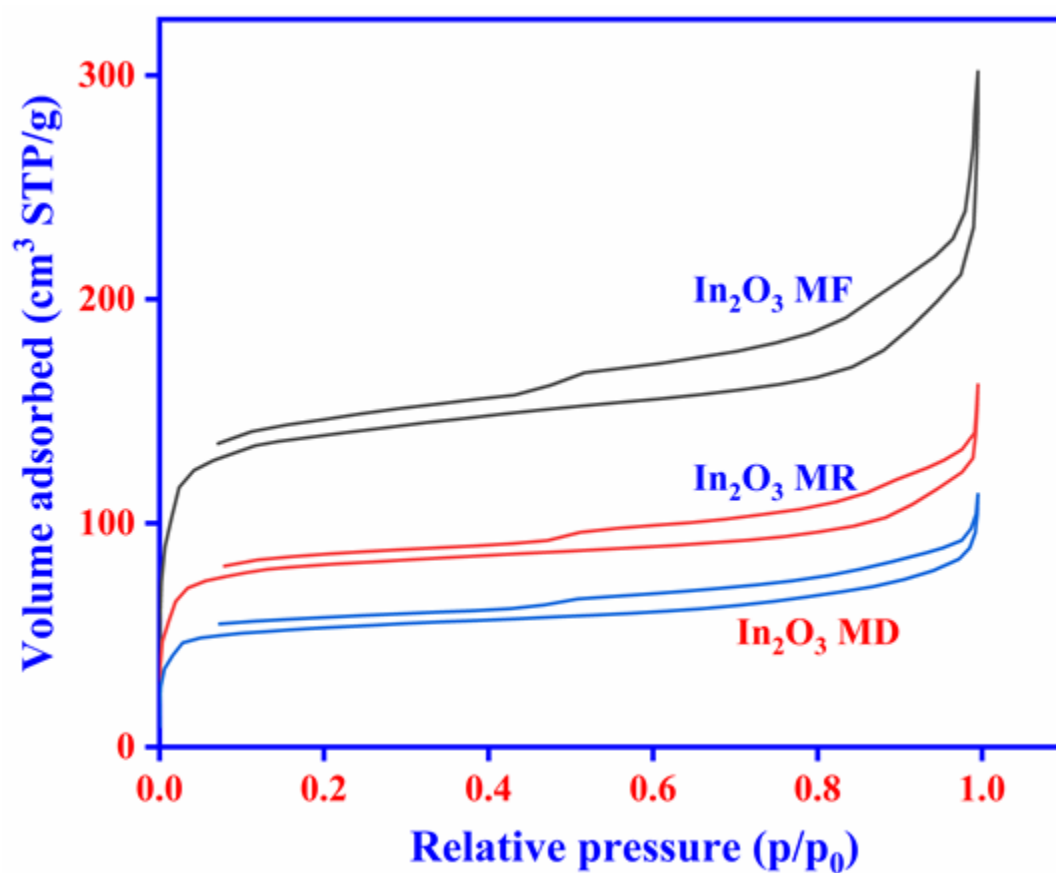

Figure S3. BET nitrogen adsorption–desorption isotherms of In<sub>2</sub>O<sub>3</sub>-MD, In<sub>2</sub>O<sub>3</sub>-MR and In<sub>2</sub>O<sub>3</sub>-MF.

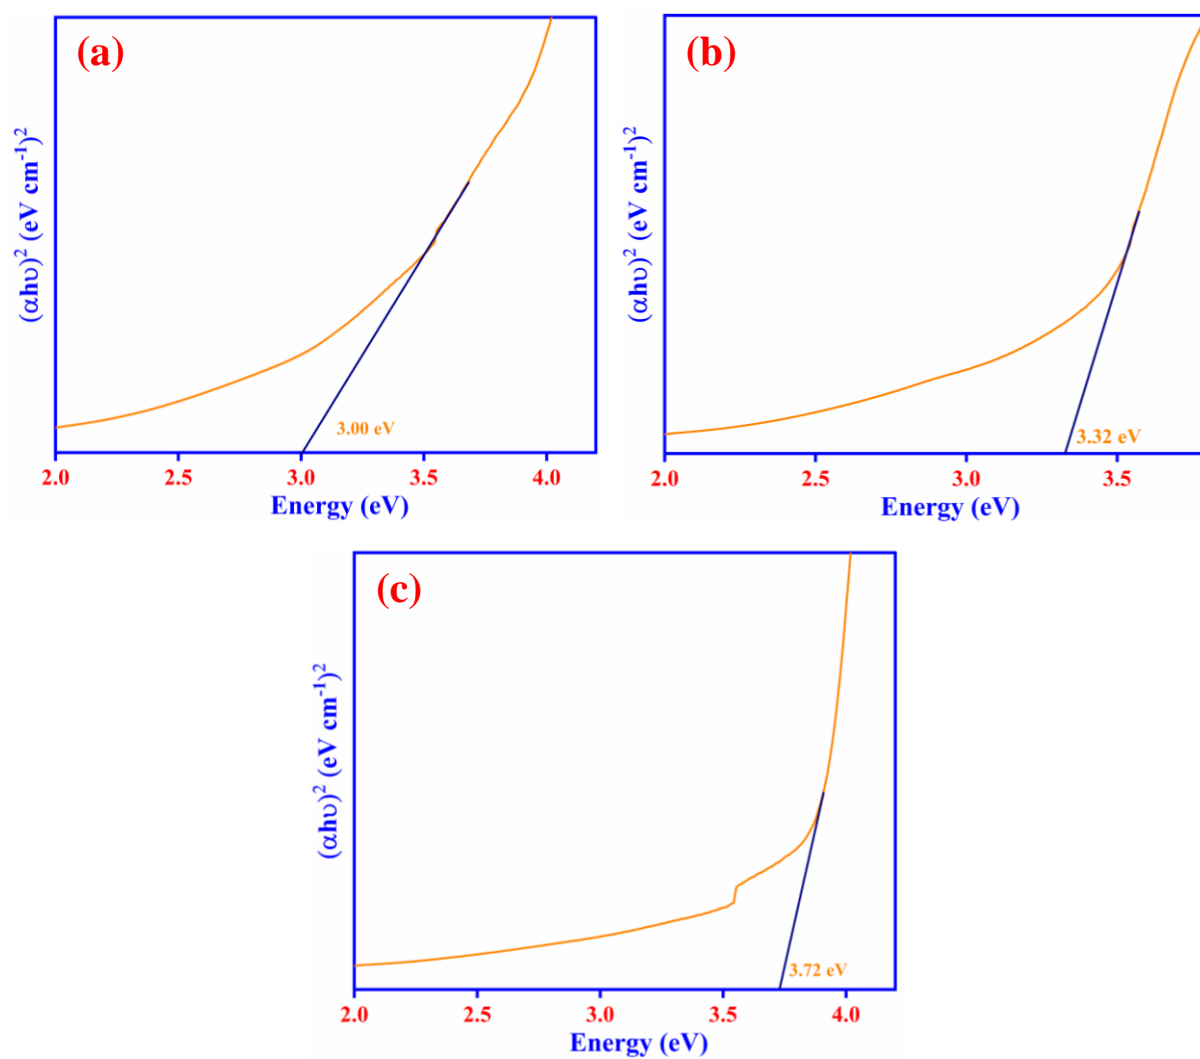

**Figure S4.** Tauc's plots of the (a) In<sub>2</sub>O<sub>3</sub>-MF, (b) In<sub>2</sub>O<sub>3</sub>-MR, (c) In<sub>2</sub>O<sub>3</sub>-MD.

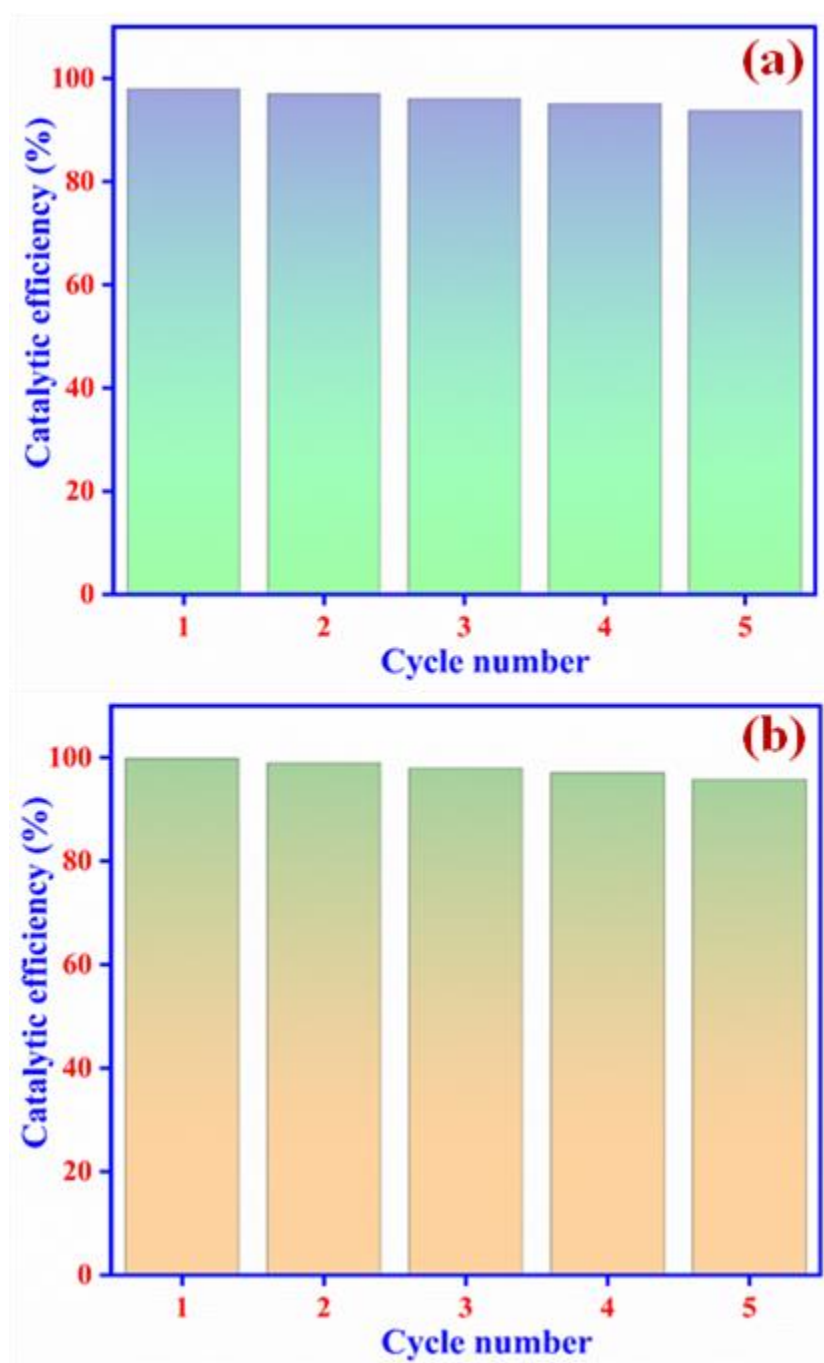

Figure S5. Recycling of In<sub>2</sub>O<sub>3</sub>-MF for 4-NP reduction (a) and MB degradation (b).

Table S1. The BET surface areas, pore volumes, and average pore sizes of all samples.

| Sample                             | BET surface area<br>(m <sup>2</sup> g <sup>-1</sup> ) | Pore Volume<br>V <sub>p</sub> (cm <sup>3</sup> g <sup>-1</sup> ) | Average Pore Size<br>D (nm) |
|------------------------------------|-------------------------------------------------------|------------------------------------------------------------------|-----------------------------|
| In <sub>2</sub> O <sub>3</sub> -MF | 486.95                                                | 0.23                                                             | 0.718                       |
| In <sub>2</sub> O <sub>3</sub> -MR | 283.26                                                | 0.13                                                             | 0.767                       |
| In <sub>2</sub> O <sub>3</sub> -MD | 182.27                                                | 0.08                                                             | 0.783                       |

**Table S2.** Comparison of present study with previously reported studies.

| Pollutant             | Photocatalyst (g/L)                                              | Light source                    | Reaction Time (min) | Degradation % | Ref.                                      |
|-----------------------|------------------------------------------------------------------|---------------------------------|---------------------|---------------|-------------------------------------------|
| <b>4-Nitrophenol</b>  |                                                                  |                                 |                     |               |                                           |
| 4-NP                  | Graphene/ZnO(1.0 g/L)                                            | UV light                        | 180                 | 95            | J. Porous Mater. 22 (2015) 797–806        |
| 4-NP                  | rGO/ZrO <sub>2</sub> /Ag <sub>3</sub> PO <sub>4</sub> (0.25 g/L) | UV light (4× 6W Hg lamp)        | 90                  | 98.3          | J. Hazard. Mater. 358 (2018) 416–426417   |
| 4-NP                  | ZnO-NCP (0.25 g/L)                                               | UV light (75 W Hg lamp, 253 nm) | 180                 | 60            | J. of Ind. Eng. Che. 20 (2014) 937–946938 |
| 4-NP                  | Ln-doped ZnO (1.0 g/L)                                           | UV light (30 W Hg lamp)         | 195                 | 81.63         | J. Mole. Cat. A: Chem. 365 (2012) 120–127 |
| <b>4-NP</b>           | <b>In<sub>2</sub>O<sub>3</sub>-MF (0.3 g/L)</b>                  | <b>Xe lamp (300 W)</b>          | <b>20</b>           | <b>99.32</b>  | <b>Present work</b>                       |
| <b>Methylene Blue</b> |                                                                  |                                 |                     |               |                                           |
| MB                    | ZnO-GO/CGH (1.0 g/L)                                             | Xe lamp (300 W)                 | 180                 | 99            | RSC Adv. 9 (2019) 41209                   |
| MB                    | N-ZnO/GO                                                         | UV light (200 W)                | 35                  | 95            | Chemosphere 236 (2019), 124368            |
| MB                    | RGO-Ag/ZnO (0.5 g/L)                                             | Metal halide lamp               | 120                 | 99            | J. Environ. Che. Eng. 8 (2020) 1041063    |
| MB                    | TiO <sub>2</sub> /ZnO/rGO (0.5 g/L)                              | Xe lamp (300 W)                 | 120                 | 99            | Sep. Purif. Tech. 232 (2020), 115962.     |
| <b>MB</b>             | <b>In<sub>2</sub>O<sub>3</sub>-MF (0.2 g/L)</b>                  | <b>Xe lamp (300 W)</b>          | <b>3</b>            | <b>99.2</b>   | <b>Present work</b>                       |
